# Supplementary material for: Diagnostic accuracy of C-reactive protein and procalcitonin in suspected community-acquired pneumonia adults visiting emergency department and having a systematic thoracic CT scan
Source: PubMed Central journal article supplement (PMC4608327; doi:10.1186/s13054-015-1083-6), 2015-10-16

#### **Additional file 4**

**Supplementary Figure:** C-reactive protein (upper panel) and procalcitonin (lower panel) ROC curves predicting definite community-acquired pneumonia diagnosis (definite community acquired pneumonia versus excluded community acquired pneumonia without extra-pulmonary infections). For C-reactive protein: AUC = 0.851. CI95% = 0.790 to 0.913. Youden's Index = 0.596 for an optimal cut-off CRP point at 45.95mg/L.

For procalcitonin: AUC = 0.718. CI95% = 0.636 to 0.799. Youden's Index = 0.358 for an optimal PCT cut-off point at 0.127  $\mu$ g/L.

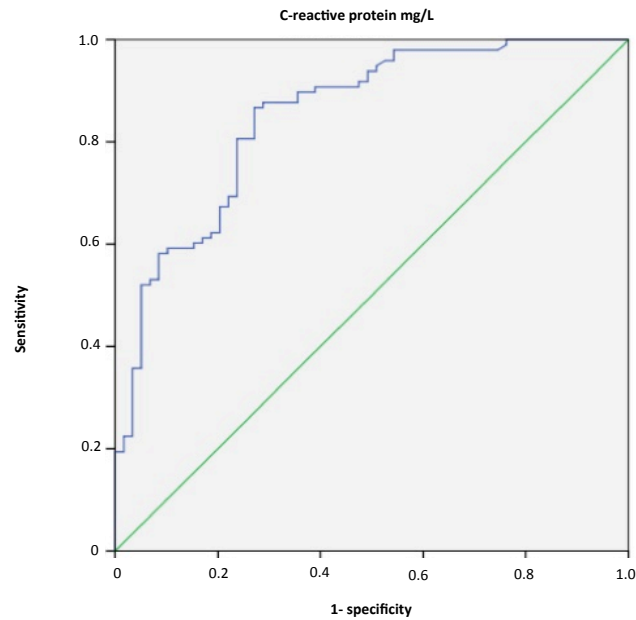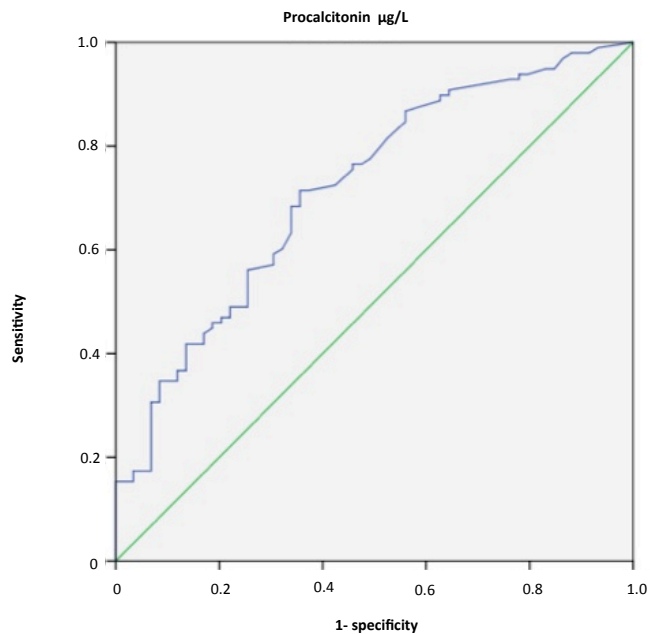

Supplement: 13054_2015_1083_MOESM4_ESM.pdf [file 13054_2015_1083_MOESM4_ESM.pdf]
