# Supplementary material for: Diagnostic accuracy of C-reactive protein and procalcitonin in suspected community-acquired pneumonia adults visiting emergency department and having a systematic thoracic CT scan
Source: Springer Nature journal article supplement (doi:10.1186/s13054-015-1083-6), 2015-10-13

**Additional file 3**

**Supplementary Figure:** C-reactive protein (CRP) (upper panel) and procalcitonin (PCT) (lower panel) boxplot for patients with excluded CAP according to each category of alternative diagnosis. PCT values greater than 5 µg/L are not shown.

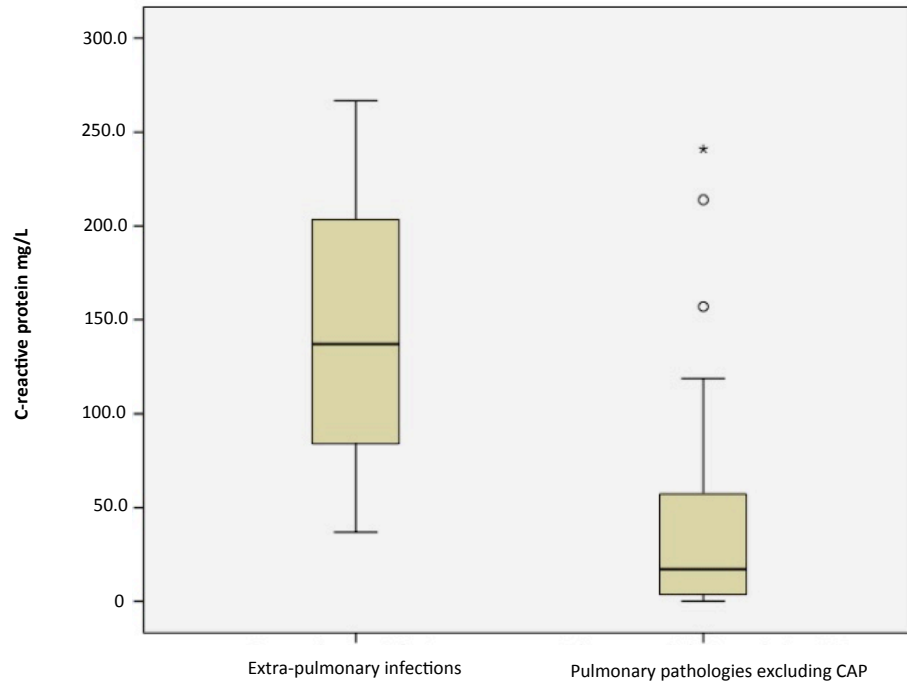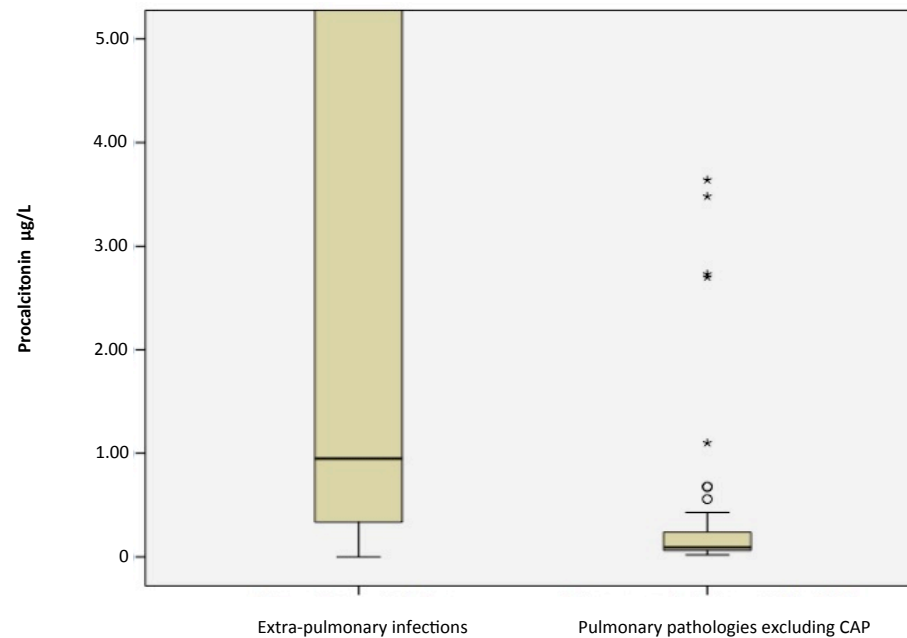

Supplement: MOESM3 [file 9780776]
